# Supplementary material for: CUL4A, ERCC5, and ERCC1 as Predictive Factors for Trabectedin Efficacy in Advanced Soft Tissue Sarcomas (STS): A Spanish Group for Sarcoma Research (GEIS) Study
Source: Cancers (Basel). 2020 Apr 30;12(5):1128. doi: 10.3390/cancers12051128 (PMC7281106; doi:10.3390/cancers12051128)
Supplement: Supplementary file 1 [file cancers-12-01128-s001.pdf]

# ***CUL4A, ERCC5 and ERCC1 as predictive factors for trabectedin efficacy in advanced soft tissue sarcomas (STS). A Spanish Group for Sarcoma Research (GEIS) Study***

David S. Moura, Paloma Sanchez-Bustos, Antonio Fernandez-Serra, María Lopez-Alvarez, José L. Mondaza-Hernandez, Elena Blanco-Alcaina, Angela Gavilan-Naranjo, Paula Martinez-Delgado, Serena Lacerenza, Paloma Santos-Fernandez, Irene Carrasco-Garcia, Samuel Hidalgo-Rios, Antonio Gutierrez, Rafael Ramos, Nadia Hindi, Miguel Taron, Jose Antonio Lopez-Guerrero and Javier Martin-Broto

## **Supplementary Material**

**Table S1.** Bivariate correlations of gene expression. (Spearman's rank correlation coefficient ( $\rho$ )).

| Whole Series |                               |                               |                               |                               |
|--------------|-------------------------------|-------------------------------|-------------------------------|-------------------------------|
|              | <i>BRCA1</i>                  | <i>CUL4A</i>                  | <i>ERCC1</i>                  | <i>ERCC5</i>                  |
| <i>BRCA1</i> | -                             | $\rho = 0.468$<br>$p < 0.001$ | $\rho = 0.689$<br>$p < 0.001$ | $\rho = 0.419$<br>$p = 0.001$ |
| <i>CUL4A</i> | $\rho = 0.468$<br>$p < 0.001$ | -                             | $\rho = 0.668$<br>$p < 0.001$ | $\rho = 0.703$<br>$p < 0.001$ |
| <i>ERCC1</i> | $\rho = 0.689$<br>$p < 0.001$ | $\rho = 0.668$<br>$p < 0.001$ | -                             | $\rho = 0.599$<br>$p < 0.001$ |
| <i>ERCC5</i> | $\rho = 0.419$<br>$p = 0.001$ | $\rho = 0.703$<br>$p < 0.001$ | $\rho = 0.599$<br>$p < 0.001$ | -                             |

**Table S2.** Correlation between gene expression and clinical variables.

| Whole series <sup>1</sup> |                                |                                |                                |                                |
|---------------------------|--------------------------------|--------------------------------|--------------------------------|--------------------------------|
|                           | <i>BRCA1</i> (n = 64)          | <i>CUL4A</i> (n = 65)          | <i>ERCC1</i> (n = 64)          | <i>ERCC5</i> (n = 66)          |
| ECOG**                    | $\rho = -0.122$<br>$p = 0.343$ | $\rho = 0.023$<br>$p = 0.859$  | $\rho = -0.012$<br>$p = 0.928$ | $\rho = 0.141$<br>$p = 0.262$  |
| Grade***                  | $\rho = -0.191$<br>$p = 0.137$ | $\rho = -0.298$<br>$p = 0.017$ | $\rho = -0.321$<br>$p = 0.011$ | $\rho = -0.280$<br>$p = 0.025$ |
| L-Sarcomas****            | $\rho = 0.031$<br>$p = 0.806$  | $\rho = 0.139$<br>$p = 0.268$  | $\rho = 0.094$<br>$p = 0.461$  | $\rho = 0.121$<br>$p = 0.332$  |
|                           | <i>BRCA1</i> (n = 34)          | <i>CUL4A</i> (n = 33)          | <i>ERCC1</i> (n = 32)          | <i>ERCC5</i> (n = 34)          |
| ECOG**                    | $\rho = -0.189$<br>$p = 0.285$ | $\rho = -0.086$<br>$p = 0.635$ | $\rho = -0.197$<br>$p = 0.279$ | $\rho = 0.063$<br>$p = 0.724$  |
| Grade***                  | $\rho = -0.151$<br>$p = 0.402$ | $\rho = -0.125$<br>$p = 0.495$ | $\rho = -0.354$<br>$p = 0.051$ | $\rho = -0.393$<br>$p = 0.024$ |
| L-Sarcomas****            | $\rho = -0.059$<br>$p = 0.739$ | $\rho = 0.026$<br>$p = 0.886$  | $\rho = 0.000$<br>$p = 1.000$  | $\rho = -0.059$<br>$p = 0.739$ |
|                           | <i>BRCA1</i> (n = 30)          | <i>CUL4A</i> (n = 32)          | <i>ERCC1</i> (n = 32)          | <i>ERCC5</i> (n = 32)          |
| ECOG**                    | $\rho = -0.098$<br>$p = 0.613$ | $\rho = 0.044$<br>$p = 0.816$  | $\rho = 0.178$<br>$p = 0.337$  | $\rho = 0.226$<br>$p = 0.221$  |
| Grade***                  | $\rho = -0.186$<br>$p = 0.333$ | $\rho = -0.423$<br>$p = 0.018$ | $\rho = -0.423$<br>$p = 0.018$ | $\rho = -0.158$<br>$p = 0.395$ |
| L-Sarcomas****            | $\rho = 0.205$<br>$p = 0.276$  | $\rho = 0.438$<br>$p = 0.012$  | $\rho = 0.188$<br>$p = 0.303$  | $\rho = 0.313$<br>$p = 0.081$  |

<sup>1</sup> Whole series: includes all the cases from both arms; <sup>2</sup> Control Group: Doxorubicin; <sup>3</sup> Experimental Group: Doxorubicin plus Trabectedin. \* Disease type: localized vs metastatic; \*\*ECOG: 1 vs. 0;

\*\*\*Grade 3 vs 1 and 2; \*\*\*\*L-Sarcomas (liposarcoma and leiomyosarcoma): Yes vs. No. Spearman's rank correlation coefficient: ( $\rho$ ).

**Table S3.** Demographics and clinical-pathologic information of the subset of cases included in protein expression analysis (n = 85).

| Median Age (Range).            | 52 (19–77)  |
|--------------------------------|-------------|
| Sex:                           |             |
| Female                         | 37 (44%)    |
| Male                           | 48 (56%)    |
| Median Tumor Size (mm) (Range) | 91 (2–1342) |
| Histological Grade:            |             |
| 1                              | 13 (15.8%)  |
| 2                              | 21 (25.6%)  |
| 3                              | 48 (58.6%)  |
| Primary tumor site:            |             |
| Extremity                      | 31 (36.9%)  |
| Head and Neck                  | 4 (4.8%)    |
| Trunk Wall                     | 6 (7.1%)    |
| Retroperitoneum                | 19 (22.6%)  |
| Others                         | 24 (28.6%)  |
| Disease type:                  |             |
| Localized                      | 43 (55.8%)  |
| Metastatic                     | 34 (44.2%)  |
| Sarcoma subtypes:              |             |
| Leiomyosarcoma                 | 27 (31.8%)  |
| Liposarcoma                    | 13 (15.3%)  |
| UPS*                           | 14 (16.5%)  |
| Fibrosarcoma                   | 4 (4.7%)    |
| Hemangiopericytoma             | 4 (4.7%)    |
| MPNST**                        | 4 (4.7%)    |
| Synovial Sarcoma               | 4 (4.7%)    |
| Others***                      | 15 (17.6%)  |
| Experimental Arm:              |             |
| Doxorubicin                    | 44 (51.8%)  |
| Doxorubicin plus Trabectedin   | 41 (48.2%)  |

\* UPS: Undifferentiated pleomorphic sarcoma; \*\*MPNST: Malignant peripheral nerve sheath tumor.

\*\*\* Others: Angiosarcoma (n = 3); Fibromyxoid sarcoma (n = 1); Hemangioendothelioma (n = 1); and Unclassified sarcoma (n = 10).

**Table S4.** Univariate analysis taking into account CUL4A protein expression.

| WHOLE SERIES                    |                                 |       |                                |       |
|---------------------------------|---------------------------------|-------|--------------------------------|-------|
| Biomarker                       | Median PFS (months)<br>(95% CI) | p     | Median OS (months)<br>(95% CI) | p     |
| CUL4A ( <i>n</i> = 85)          |                                 |       |                                |       |
| Negative                        | 7.03 (5.03–9.04)                | 0.009 | 21.07 (17.70–24.43)            | 0.001 |
| Positive                        | 2.60 (0.58–4.62)                |       | 10.57 (5.95–15.18)             |       |
| CONTROL GROUP <sup>1</sup>      |                                 |       |                                |       |
| Biomarker                       | Median PFS (months)<br>(95% CI) | p     | Median OS (months)<br>(95% CI) | p     |
| CUL4A ( <i>n</i> = 44)          |                                 |       |                                |       |
| Negative                        | 7.40 (4.45–0.35)                | 0.025 | 27.03 (16.99–37.08)            | 0.004 |
| Positive                        | 2.53 (1.12–4.00)                |       | 8.73 (4.62–12.84)              |       |
| EXPERIMENTAL GROUP <sup>2</sup> |                                 |       |                                |       |
| Biomarker                       | Median PFS (months)<br>(95% CI) | p     | Median OS (months)<br>(95% CI) | p     |
| CUL4A ( <i>n</i> = 41)          |                                 |       |                                |       |
| Negative                        | 5.77 (4.25–7.28)                | 0.127 | 19.70 (8.82–30.58)             | 0.176 |
| Positive                        | 3.40 (0.83–6.00)                |       | 14.23 (5.68–22.79)             |       |

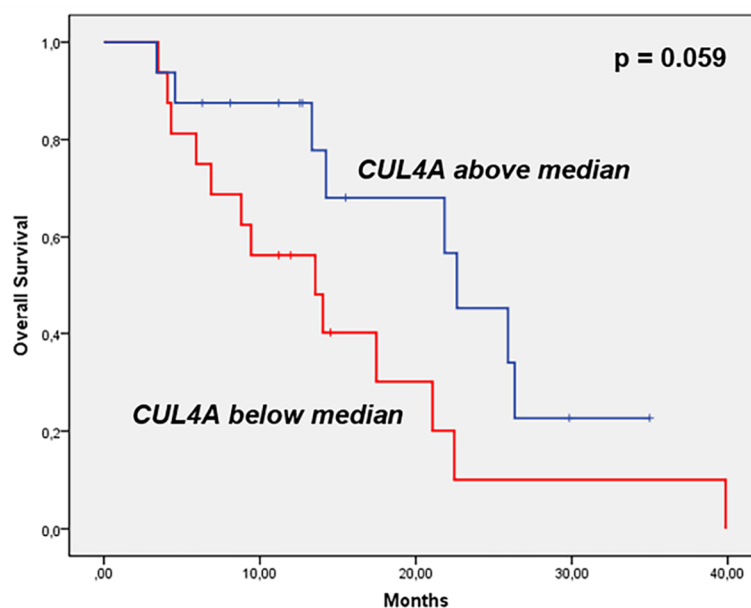

**Figure S1.** Overall Survival taking into account the median expression of *CUL4A*. Samples were grouped taking into account the median of gene expression. High expression of *CUL4A* showed a tendency for better OS (22.63 months (95% CI: 17.02–28.25) vs 13.53 months (95% CI 6.25–20.81);  $p = 0.059$ ).

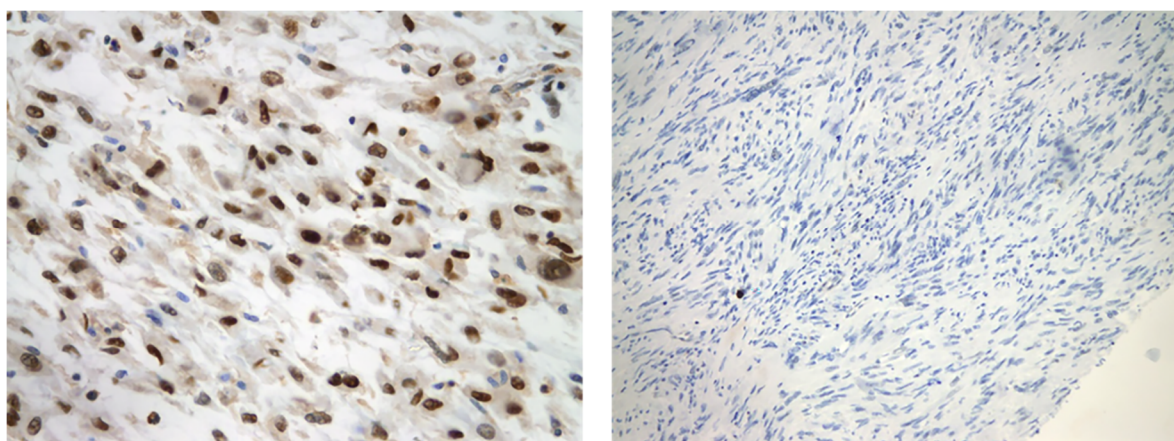

**Figure S2.** CUL4A protein expression. Example of CUL4A nuclear positive expression (left) and negative CUL4A expression (right). Immunohistochemistry was performed using an anti-CUL4A polyclonal antibody (1:50, 2699s, Cell Signaling Technology).

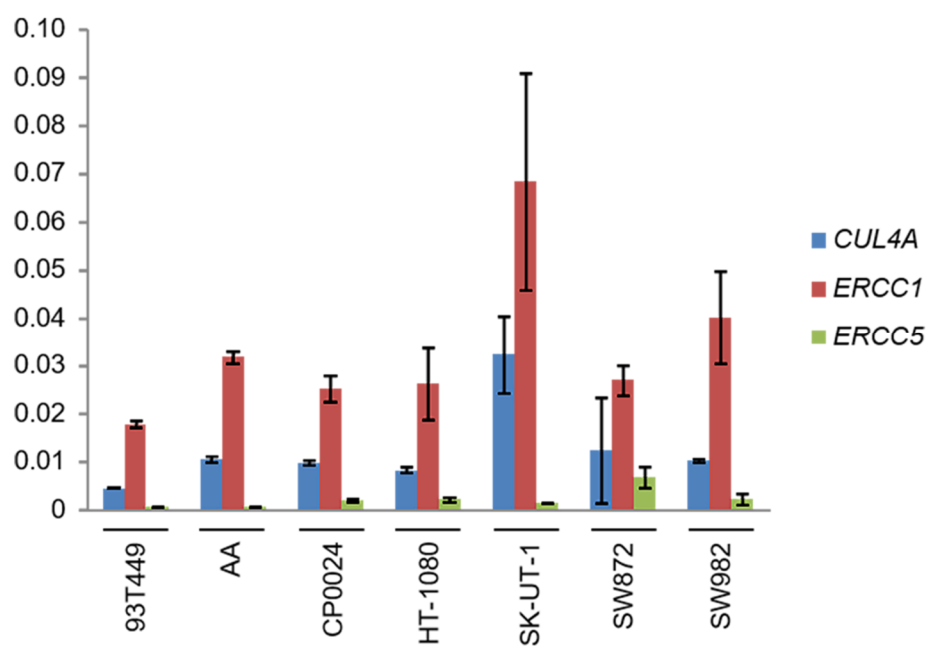

**Figure S3.** *ERCC1*, *ERCC5* and *CUL4A* expression in soft-tissue sarcoma cell lines. The expression levels were quantified by qRT-PCR and the expression levels relativized to the expression of *GAPDH*.
